# Supplementary material for: Mortality Among Pediatric Patients With Acute Lymphoblastic Leukemia in Sweden From 1988 to 2017
Source: PubMed Central journal article supplement (PMC9706364; doi:10.1001/jamanetworkopen.2022.43857), 2022-11-28
Supplement: jamanetwopen-e2243857-s001.pdf [file jamanetwopen-e2243857-s001.pdf]

## Supplementary Online Content

Björk-Eriksson T, Boström M, Bryngelsson IL, et al. Mortality among pediatric patients with acute lymphoblastic leukemia in Sweden from 1988 to 2017. *JAMA Netw Open*. 2022;5(11):e2243857. doi:10.1001/jamanetworkopen.2022.43857

**eTable 1.** Inclusion Criteria Used in the Cancer Register and the Patient Register

**eTable 2.** Codes for Cause-specific Mortality

This supplementary material has been provided by the authors to give readers additional information about their work.

**eTable 1. Inclusion Criteria Used in the Cancer Register and the Patient Register**

| <b>Registers</b> | <b>Codes</b>                                           |
|------------------|--------------------------------------------------------|
| Cancer Register  |                                                        |
| ICD-7 codes      | 204.0, 204.1, 204.9, 207.0, 207.9                      |
| PAD codes        | 206, 296, 826, 996                                     |
| Patient Register |                                                        |
| ICD-10 codes     | C91.0, C91.1, C91.3, C91.5, C91.7, C91.9, C95.0, C95.9 |
| ICD-9 codes      | 204.0, 204.1, 204.9, 208.0, 208.9                      |

Abbreviations: ICD, International Classification of Diseases; PAD, Pathological-Anatomical Diagnosis.

**eTable 2. Codes for Cause-specific Mortality**

| <b>Cause-specific mortality</b>                                    | <b>ICD-10</b> | <b>ICD-9</b> |
|--------------------------------------------------------------------|---------------|--------------|
| Malignant tumors                                                   | C00-C97       | 140-208      |
| Malignant neoplasm of the brain                                    | C71           | 191          |
| Malignant neoplasm of lymphoid, hematopoietic, and related tissues | C90-C96       | 204-208      |
| Ischemic heart disease                                             | I20-I25       | 410-414      |
| Cerebrovascular disease                                            | I61-I64       | 431-434, 436 |

Abbreviation: ICD, International Classification of Diseases.
